# Supplementary material for: Effects of Antibiotic Residues on Fish Gut Microbiome Dysbiosis and Mucosal Barrier-Related Pathogen Susceptibility in Zebrafish Experimental Model
Source: MDPI journal article supplement (doi:10.3390/antibiotics13010082), 2024-01-15
Supplement: s1 [file s1]

Table S1. Primers used in this study

| Primer                               | Accession No.  | Sequence (5'-3')                                         | Amplicon size (bp) |
|--------------------------------------|----------------|----------------------------------------------------------|--------------------|
| tlr4-F<br>tlr4-R                     | AY388400.1     | ACAGATCACCTGGACAGCAAGA<br>CGGCTTGAAAGTCCCCGCAT           | 153                |
| myd88-F<br>myd88-R                   | DQ100359.1     | GGGACTGACACCTGAGACCTT<br>CGATAAGCTCACTGGCGATGG           | 176                |
| nfkb-F<br>nfkb-R                     | DQ066717       | AAGGAATCATGGCTGGCGAG<br>GTAAGCAAGGCCCATCAACTGC           | 156                |
| il1 $\beta$ -F<br>il1 $\beta$ -R     | BC098597       | CGGCAGCTCCATAAACACCTTC<br>CGCTCGGTGTCTTTCCTGT            | 108                |
| il6-F<br>il6-R                       | NM_001261449   | CAGCTGCAGGTGAGAGACG<br>GCAGGCGTCGATCATCACG               | 132                |
| tnf $\alpha$ -F<br>tnf $\alpha$ -R   | AY427649.1     | GCTTTTCTGAATCCTACGGAGGC<br>CGTGTCTGTGCCCAGTCTG           | 155                |
| sod1-F<br>sod1-R                     | NM_131294.1    | AGACCTGGGTAATGTGACCGC<br>GCCACCCTTCCCCAAGT               | 145                |
| sod2-F<br>sod2-R                     | NM_199976.1    | TGCAGAGTCGGATATGTTTCGGAG<br>GTGAGGCTCAAGTGCACCAT         | 123                |
| hsp90-F<br>hsp90-R                   | L35587.1       | CCAAACTGGACAGCGGCAA<br>AGATCGGCTTTGGTCATCCCA             | 106                |
| cat-F<br>cat-R                       | NM_130912.2    | GATCGCTGTCCGCTTTTCCA<br>CAGTTGCCCTCATCGGTGT              | 105                |
| gpx-F<br>gpx-R                       | AY216589.1     | TGGCGTCGCTTTGAGGC<br>TCCTGGTGCCCGAACTG                   | 121                |
| muc2.2-F<br>muc2.2-R                 | XM 002667543   | ACACGCTCAAGTAATCGCACAGTC<br>TCAGCGAGTGTTTGGCTCACTT       | 137                |
| mmp9-F<br>mmp9-R                     | NM 213123.1    | CCAACATTAAAGATGCCCTGATGTAT<br>CCC<br>AGTGGTGGTCCGTGGTTGA | 146                |
| $\beta$ -def-1-F<br>$\beta$ -def-1-R | NM 001081553.1 | TGTCCTTGTCGTACTAGCATTGCAC<br>ACACACTCCTTGTCTGCAAACACC    | 100                |
| $\beta$ -actin-F<br>$\beta$ -actin-R | AF057040.1     | AGGCTCCCCTGAATCCCAA<br>GTCACACCATCACCAGAGTCC             | 160                |

Table S2. Relative abundance of zebrafish gut microbiome in phylum level

| Phylum <sup>a)</sup> | Relative abundance (%) |           |            |           |
|----------------------|------------------------|-----------|------------|-----------|
|                      | Ctrl.                  | Otc       | Smx/Tmp    | Ery       |
| Fusobacteria         | 57.11±2.6              | 55.72±4.3 | 52.09±6.4  | 52.83±4.6 |
| Proteobacteria       | 18.89±2.5              | 22.02±2.7 | 27.77±10.5 | 36.02±3.7 |
| Firmicutes           | 13.26±1.5              | 11.91±2.1 | 13.78±5.7  | 5.01±2.3  |
| Bacteroidetes        | 10.25±0.9              | 8.28±3.5  | 5.61±1.6   | 5.55±2.8  |
| Actinobacteria       | 0.36±0.1               | 1.63±1.2  | 0.40±0.3   | 0.10±0.0  |
| Planctomycetes       | 0.02±0.0               | 0.13±0.1  | 0.16±0.1   | 0.19±0.1  |
| Verrucomicrobia      | 0.01±0.0               | 0.08±0.1  | 0.12±0.0   | 0.25±0.2  |
| Tenericutes          | 0.09±0.1               | 0.22±0.4  | 0.02±0.0   | 0.001±0.0 |
| Chlamydiae           | 0.00±0.0               | 0.001±0.0 | 0.03±0.0   | 0.03±0.0  |
| Armatimonadetes      | 0.00±0.0               | 0.00±0.0  | 0.02±0.0   | 0.00±0.0  |
| Deinococcus-Thermus  | 0.003±0.0              | 0.00±0.0  | 0.006±0.0  | 0.00±0.0  |
| Acidobacteria        | 0.00±0.0               | 0.001±0.0 | 0.002±0.0  | 0.002±0.0 |
| Spirochaetes         | 0.00±0.0               | 0.00±0.0  | 0.005±0.0  | 0.00±0.0  |
| Cyanobacteria        | 0.00±0.0               | 0.00±0.0  | 0.00±0.0   | 0.004±0.0 |
| Other                | 0.00±0.0               | 0.00±0.0  | 0.00±0.0   | 0.007±0.0 |

<sup>a)</sup> Values are presented as means±SD.

Table S3. Relative abundance of zebrafish gut microbiome in species level

| Species <sup>a)</sup>                   | Relative abundance (%) |           |           |           |
|-----------------------------------------|------------------------|-----------|-----------|-----------|
|                                         | Ctrl.                  | Otc       | Smx/Tmp   | Ery       |
| <i>Cetobacterium somerae</i>            | 57.10±2.6              | 55.72±4.3 | 52.08±6.4 | 52.83±4.6 |
| <i>Aeromonas veronii</i>                | 10.06±0.6              | 10.02±3.3 | 9.24±1.5  | 25.57±1.4 |
| KM585593                                | 9.47±1.0               | 9.23±2.1  | 9.10±4.6  | 3.41±1.6  |
| <i>Cellvibrio fibrivorans</i>           | 1.27±0.8               | 1.23±0.3  | 9.63±9.1  | 2.65±3.3  |
| <i>Shewanella xiamenensis</i>           | 2.75±0.5               | 4.25±2.1  | 3.88±0.4  | 0.66±0.2  |
| KM585593_g_uc <sup>b)</sup>             | 3.61±0.3               | 2.04±0.9  | 3.74±2.0  | 1.44±0.7  |
| Bacteroides_uc                          | 4.36±3.6               | 2.46±1.5  | 1.28±0.6  | 0.06±0.0  |
| Bacteroidaceae_uc                       | 3.75±2.1               | 0.72±0.6  | 0.30±0.1  | 0.01±0.0  |
| <i>Flavobacterium ginsenosidimutans</i> | 0.07±0.0               | 0.24±0.2  | 0.03±0.0  | 3.30±1.8  |
| <i>Flavobacterium granuli</i>           | 0.18±0.0               | 2.13±2.2  | 0.30±0.2  | 0.41±0.2  |
| GQ360021_g_uc                           | 1.55±0.7               | 0.75±0.2  | 0.56±0.2  | 0.02±0.0  |
| <i>Gemmobacter fontiphilus</i>          | 0.75±0.4               | 0.65±0.5  | 0.56±0.2  | 0.72±0.4  |
| Rhodobacteraceae_uc                     | 0.02±0.0               | 2.13±1.7  | 0.25±0.2  | 0.25±0.3  |
| <i>Flavobacterium succinicans</i>       | 0.05±0.0               | 0.73±0.9  | 1.13±0.8  | 0.66±0.5  |
| <i>Aeromonas caviae</i>                 | 1.60±0.3               | 0.01±0.0  | 0.00±0.0  | 0.004±0.0 |
| <i>Flavobacterium cutihirudinis</i>     | 0.002±0.0              | 0.01±0.0  | 1.44±0.8  | 0.01±0.0  |
| <i>Rhodococcus erythropolis</i>         | 0.01±0.0               | 1.39±1.1  | 0.01±0.0  | 0.00±0.0  |
| <i>Rhizobium arenae</i>                 | 0.11±0.1               | 0.003±0.0 | 0.003±0.0 | 1.28±0.2  |
| <i>Kinneretia asaccharophila</i>        | 0.96±0.4               | 0.01±0.0  | 0.29±0.1  | 0.03±0.0  |
| <i>Plesiomonas shigelloides</i>         | 0.002±0.0              | 0.07±0.1  | 0.06±0.1  | 0.90±1.5  |
| <i>Flavobacterium notoginsengisoli</i>  | 0.16±0.1               | 0.37±0.2  | 0.003±0.0 | 0.35±0.3  |
| Hyphomicrobium_uc                       | 0.002±0.0              | 0.35±0.2  | 0.042±0.3 | 0.08±0.0  |
| EU234324                                | 0.001±0.0              | 0.35±0.2  | 0.25±0.1  | 0.19±0.1  |
| <i>Pseudomonas alcaligenes</i>          | 0.002±0.0              | 0.00±0.0  | 0.00±0.0  | 0.77±0.6  |
| <i>Bacteroides vulgatus</i>             | 0.02±0.0               | 0.61±1.0  | 0.08±0.1  | 0.05±0.0  |

<sup>a)</sup> Values are presented as means±SD.

<sup>b)</sup> ‘uc’ means unclassified.

Table S4. Number of goblet cells per villus

| Number of goblet cells (n = 10) <sup>a)</sup> |         |         |         | <i>p</i> value <sup>b)</sup> |               |           |
|-----------------------------------------------|---------|---------|---------|------------------------------|---------------|-----------|
| Ctrl.                                         | Otc     | Smx/Tmp | Ery     | Ctrl.-Otc                    | Ctrl.-Smx/Tmp | Ctrl.-Ery |
| 2.5±1.3                                       | 3.9±1.9 | 5.6±2.3 | 4.9±1.6 | 0.0696                       | 0.0016        | 0.0016    |

<sup>a)</sup> Values are presented as means±SD.

<sup>b)</sup> Significance was determined by *t*-test.

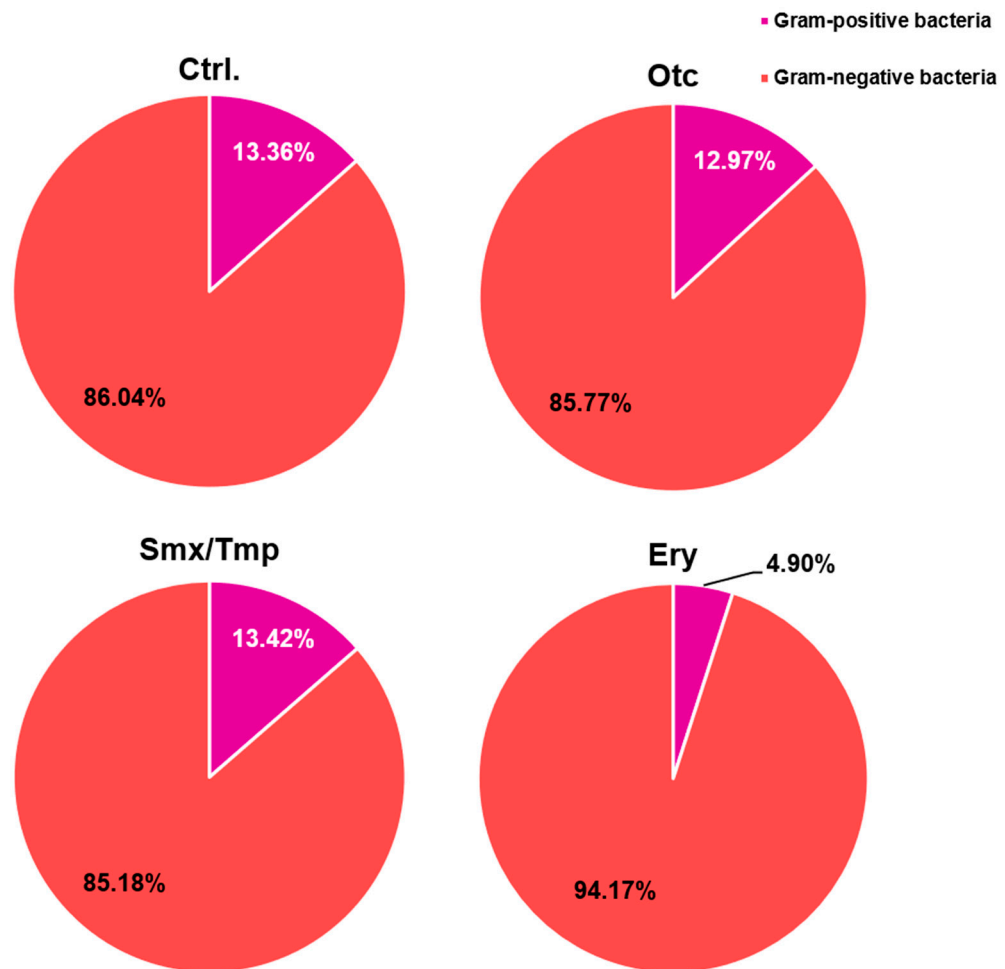

Figure S1. Relative abundance of Gram-positive bacteria and Gram-negative bacteria in zebrafish gut microbiome.
